# Supplementary material for: A human antibody selective for transthyretin amyloid removes cardiac amyloid through phagocytic immune cells
Source: PubMed Central journal article supplement (PMC8149704; doi:10.1038/s41467-021-23274-x), 2021-05-25
Supplement: 41467_2021_23274_MOESM1_ESM.pdf [file 41467_2021_23274_MOESM1_ESM.pdf]

## Supplementary information

***Title:* A human antibody selective for transthyretin amyloid removes cardiac amyloid through phagocytic immune cells**

Aubin Michalon\*<sup>1</sup>, Andreas Hagenbuch<sup>1</sup>, Christian Huy<sup>1</sup>, Evita Varela<sup>1</sup>, Benoit Combaluzier<sup>1</sup>, Thibaud Damy<sup>2</sup>, Ole B. Suhr<sup>3</sup>, Maria J. Saraiva<sup>4</sup>, Christoph Hock<sup>1,5</sup>, Roger M. Nitsch<sup>1,5</sup>, Jan Grimm<sup>1</sup>

## Supplementary Fig. 1

Epitope mapping using overlapping peptide array. The sequences of the peptides bound by NI301A are indicated, with the common sequence identifying the binding epitope shown in bold. Two point mutations present in the peptides 38 and 40 are indicated in green color.

NI301A 100 nM Exp. 30 s.

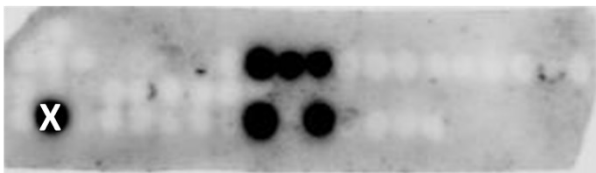

2nd Ab only Exp. 5 min

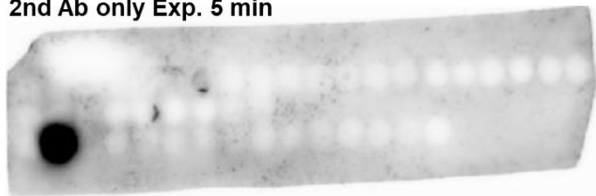

09           FRKAADD**W**EPFASG  
10                 ADD**TW**EPFASGKTSE  
11                         **W**EPFASGKTSESGEL  
38  INVAVHVFR**N**AADD**TW**EPFA  
40                 AADD**TW**EP**FN**SGKTSESGEL

## Supplementary Fig. 2

TTR immunoprecipitation experiment (Fig. 1H): images of the entire western blot membranes.

TTR selective bands run at 14 kDa for TTR monomers and ~30 kDa for TTR dimers. In addition, human heavy chains (~50 kDa) are detected by the protein A-HRP detection system. There are two sources of human heavy chains in this experiment, the NI301A and isotype control antibodies used for IP (but not Dako A0002, which is a rabbit polyclonal antibody), and the human IgGs present in human serum which are carried over in a serum concentration dependent manner.

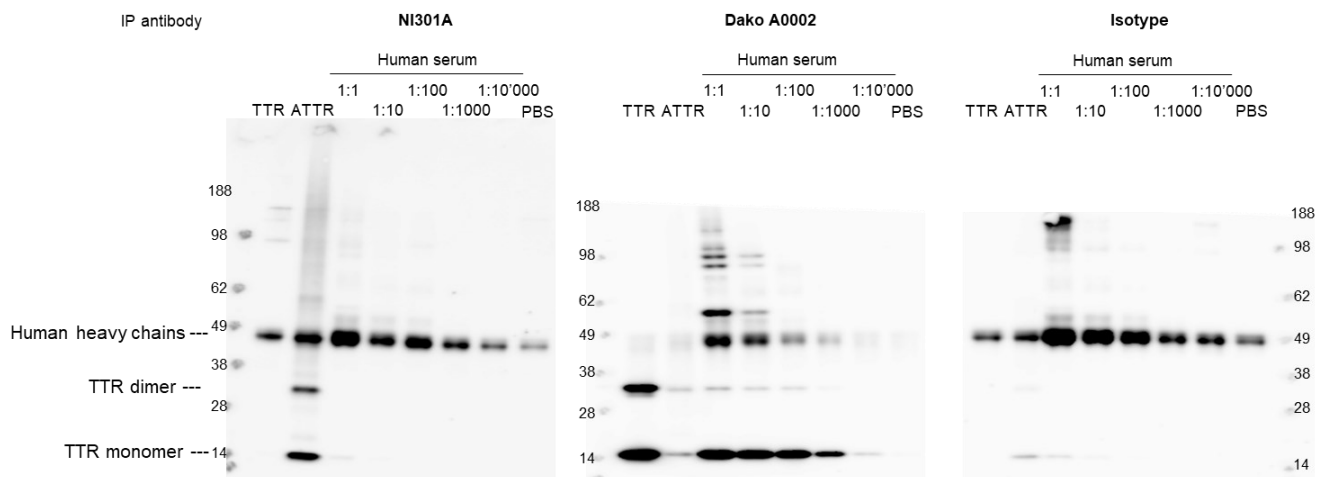

### Supplementary Fig. 3

Long exposure duration of the western blot presented in Figure 3 did not reveal any unspecific binding of NI301A to the non-TTR proteins presents in the amyloid fibril extract.

Exposure duration: 1 min

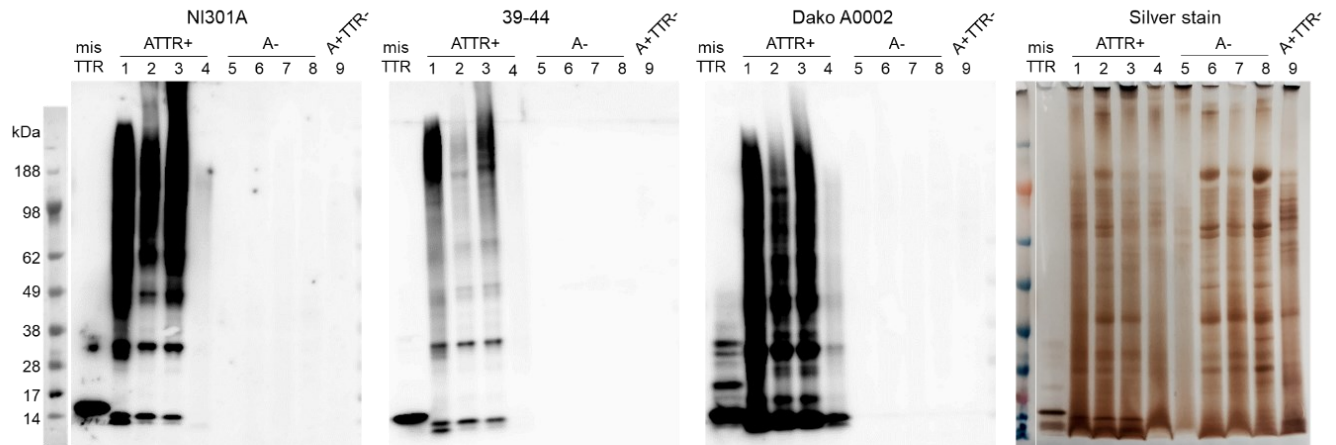

Exposure duration: 5 min

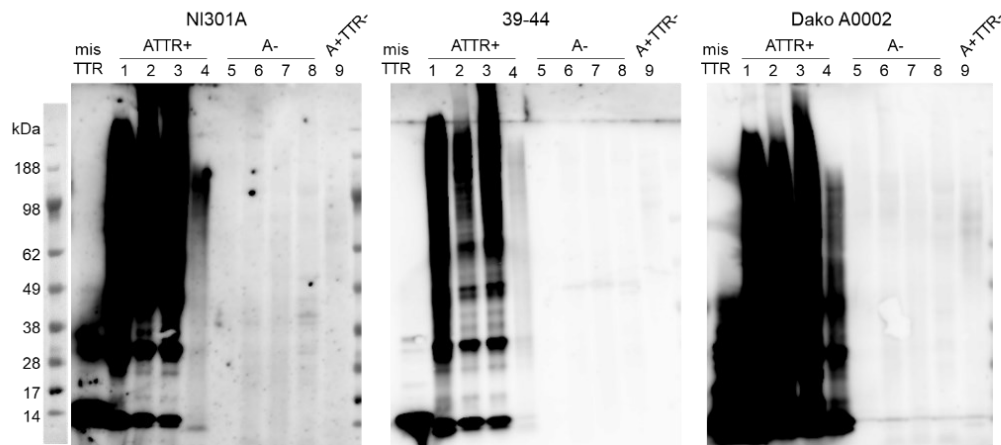

### Supplementary Fig. 4

Evaluation of NI301A binding selectivity by immunohistochemistry on human fresh frozen tissue arrays. The arrays contained 90 tissue sections representing 30 different organs each from three different individuals. An ATTR+ myocardium tissue section was added on each slide as positive control. Representative images for ATTR+ heart (positive control) and liver, heart and nerve normal tissues.

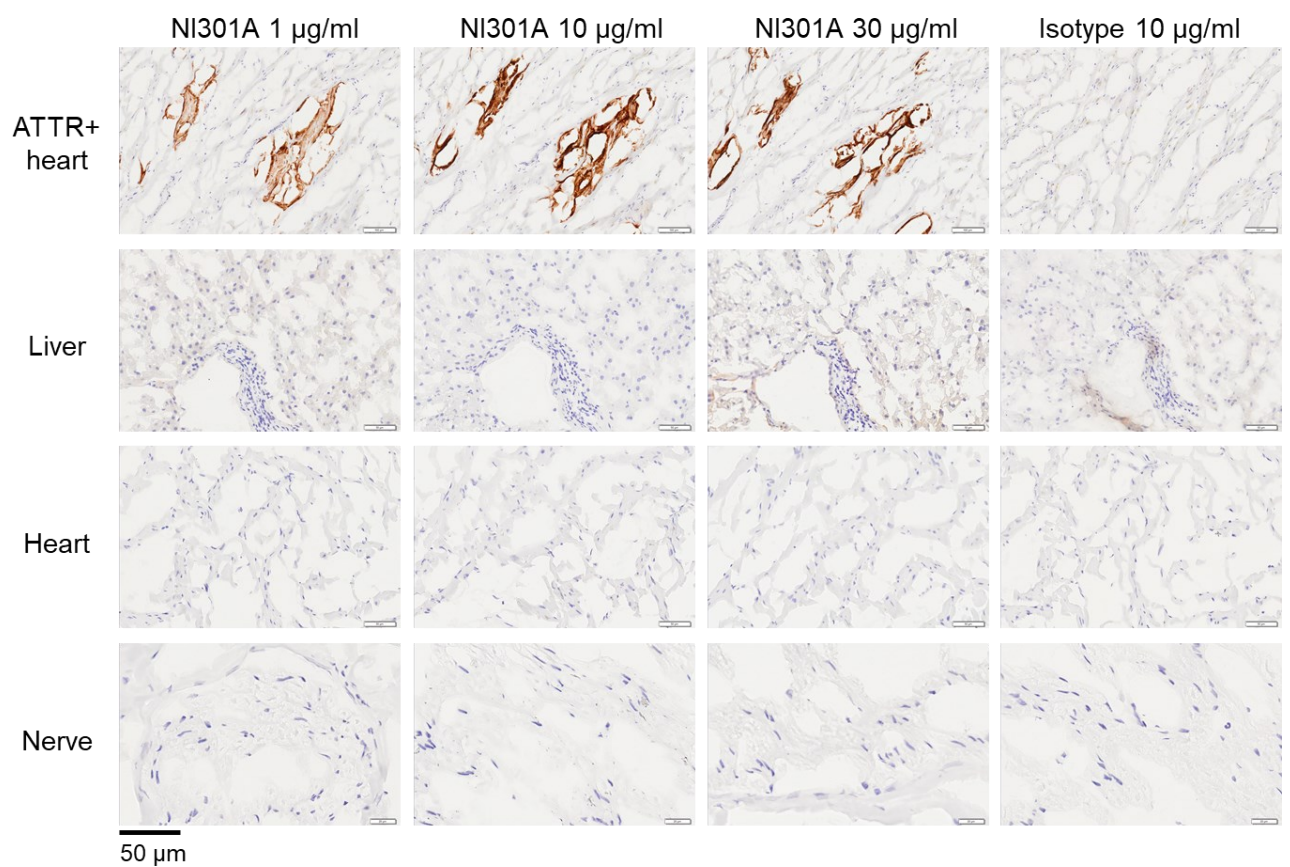

### Supplementary Fig. 5

Gating strategy to determine the percentage of macrophages double positive for fluorescently conjugated NI301A antibody (NI301A-550) and fluorescently conjugated ATTR-L55P aggregates (ATTR-L55P-488). Plots are presented for the following conditions: 1) ATTR-L55P 7  $\mu\text{g/mL}$ , no antibody; 2) ATTR-L55P 7  $\mu\text{g/mL}$  and NI301A 10 nM; 3) ATTR-L55P 7  $\mu\text{g/mL}$  and NI301A 80 nM; 4) NI301A 80 nM, no ATTR.

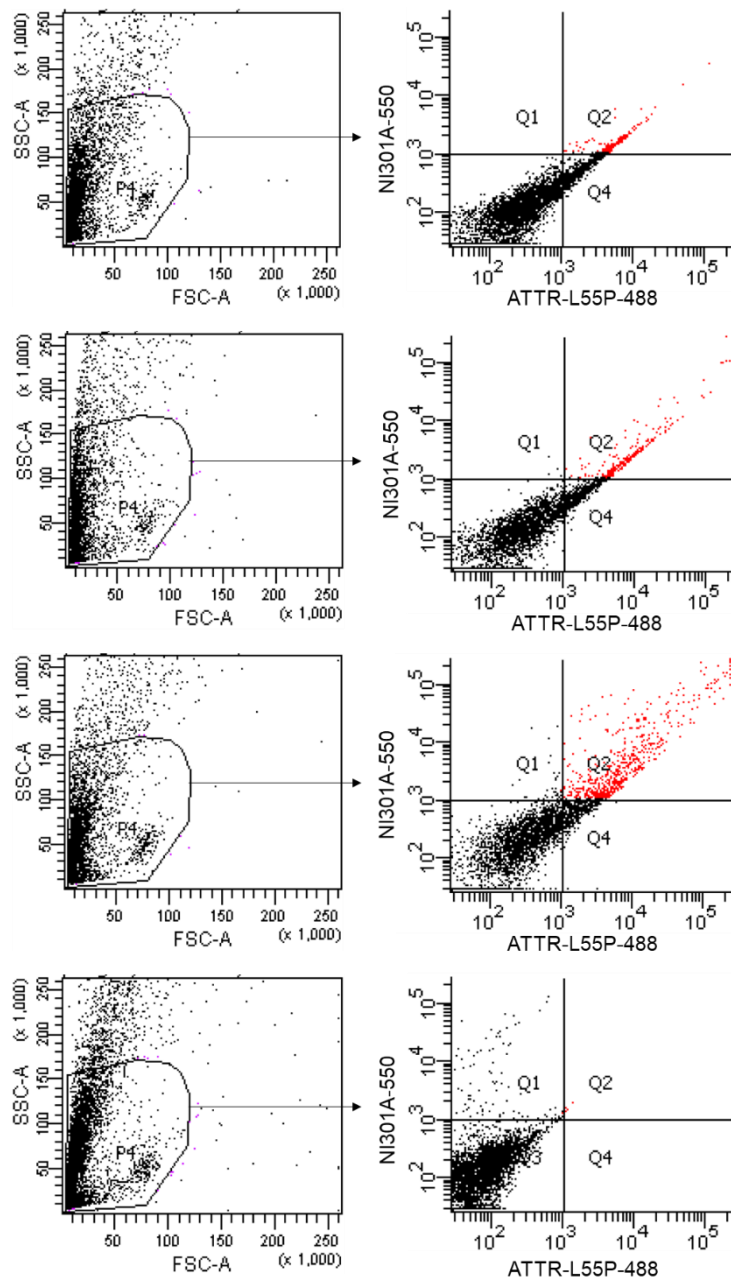



## Supplementary Fig. 6

Characterization of cells infiltrating the ATTR fibril grafts for the expression of CD11B, LY6G and IBA1.

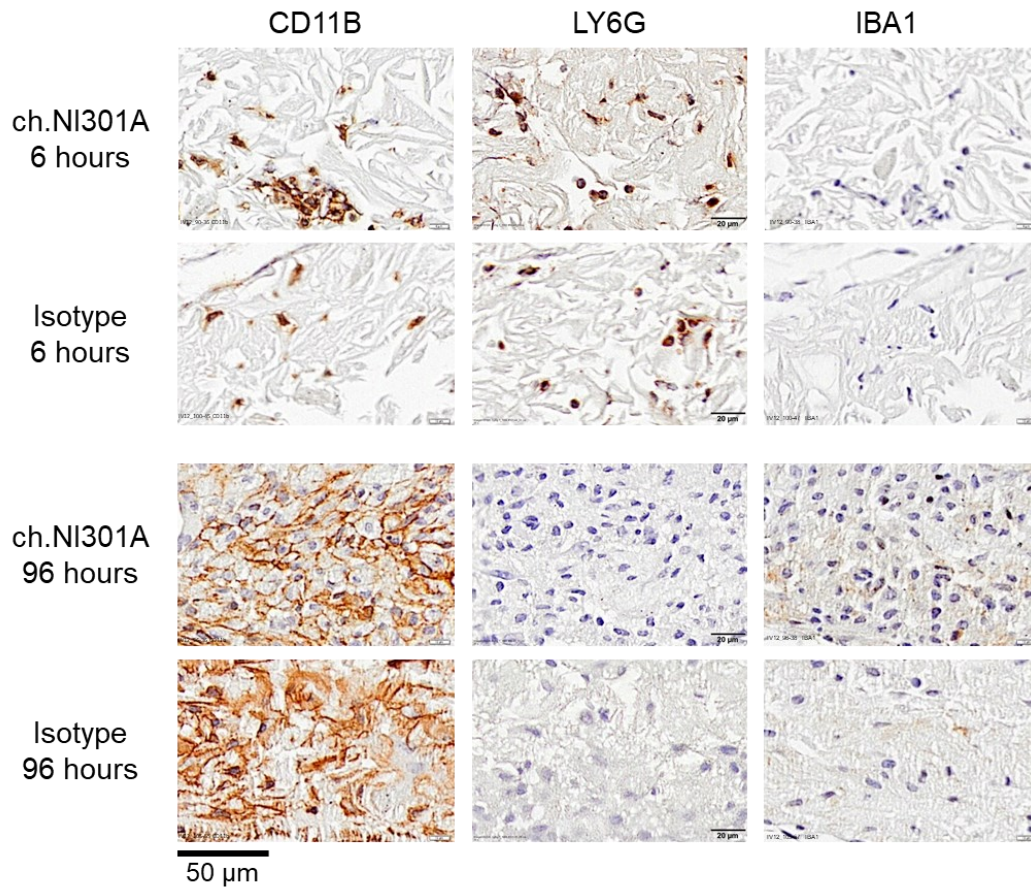

## Supplementary Fig. 7

Exemplary staining of autopsy samples from patients with heart failure analyzed for presence of ATTR amyloidosis using the amyloid dye congo red and immunohistochemistry with NI301A biotin conjugate.

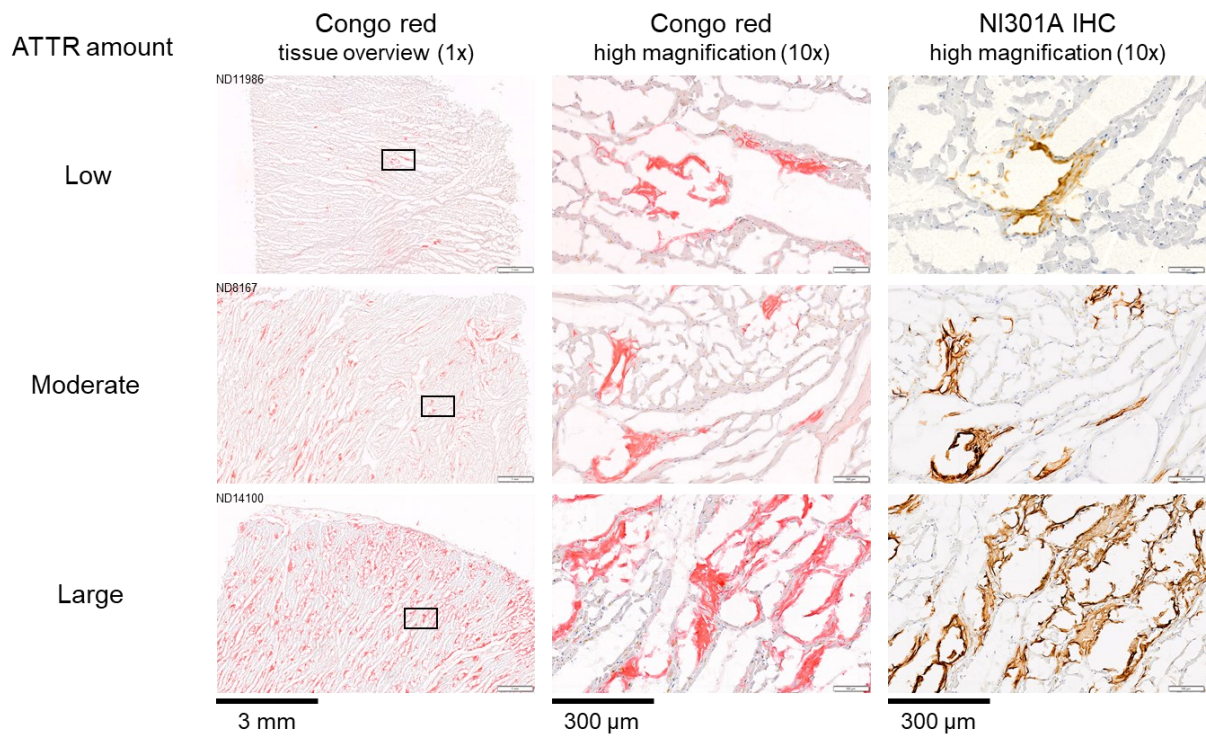



## Supplementary Table 1

List of autopsy samples from patients with heart failure analyzed for presence of ATTR amyloidosis. All subjects are males over 80 years old.

| N° | ID             | DISEASE | CAUSE OF DEATH           | ORIGIN | ATTR | ATTR AMOUNT |
|----|----------------|---------|--------------------------|--------|------|-------------|
| 1  | ND08018        | Norany  | Subdural hematoma        | C      | -    | 0           |
| 2  | <b>ND08167</b> | Norany  | Delirium                 | C      | +    | large       |
| 3  | ND08226        | Norany  | Respiratory failure      | C      | -    | 0           |
| 4  | ND08560        | Cardio  | Cardiopulmonary arrest   | C      | -    | 0           |
| 5  | <b>ND08587</b> | Norany  | Heart failure            | C      | +    | large       |
| 6  | ND08820        | Norany  | Cardiac arrest           | C      | -    | 0           |
| 7  | ND08848        | Norany  | Cardiac arrest           | C      | -    | 0           |
| 8  | <b>ND08970</b> | Norany  | Congestive heart failure | C      | +    | moderate    |
| 9  | ND09164        | Norany  | Heart failure            | C      | -    | 0           |
| 10 | ND09310        | Norany  | Respiratory arrest       | C      | -    | 0           |
| 11 | ND08819        | Norany  | Cardiac arrest           | C      | -    | 0           |
| 12 | ND09378        | Norany  | Cardiac arrest           | C      | -    | 0           |
| 13 | ND09430        | Cardio  | Cardiac related          | C      | -    | 0           |
| 14 | <b>ND09796</b> | Cardio  | Cardiopulmonary arrest   | C      | +    | low         |
| 15 | ND09802        | Cardio  | Respiratory arrest       | C      | -    | 0           |
| 16 | ND09809        | Cardio  | Prostate cancer          | C      | -    | 0           |
| 17 | ND09835        | Cardio  | Cardiopulmonary arrest   | C      | -    | 0           |
| 18 | ND09951        | Cardio  | Cardiac arrest           | C      | -    | 0           |
| 19 | ND09965        | Cardio  | Cardiac arrest           | B      | -    | 0           |
| 20 | <b>ND10001</b> | Cardio  | Respiratory failure      | C      | +    | moderate    |
| 21 | <b>ND10150</b> | Cardio  | Respiratory arrest       | C      | +    | large       |
| 22 | <b>ND10183</b> | Cardio  | Cardiac arrest           | C      | +    | large       |
| 23 | <b>ND10234</b> | Cardio  | Cardiac arrest           | C      | +    | large       |
| 24 | ND10338        | Cardio  | Cardiac arrest           | C      | -    | 0           |
| 25 | <b>ND10351</b> | Cardio  | Cardiac arrest           | C      | +    | moderate    |
| 26 | ND10386        | Cardio  | Respiratory failure      | C      | -    | 0           |
| 27 | ND10501        | Cardio  | Cardiac arrest           | C      | -    | 0           |
| 28 | ND10507        | Cardio  | Cardiopulmonary arrest   | C      | -    | 0           |
| 29 | ND10703        | Cardio  | Cardiac arrest           | C      | +    | large       |
| 30 | <b>ND10800</b> | Cardio  | Cardiac arrest           | C      | +    | moderate    |
| 31 | ND10871        | Cardio  | Congestive heart failure | C      | -    | 0           |
| 32 | ND10878        | Cardio  | Congestive heart failure | C      | -    | 0           |
| 33 | ND10884        | Cardio  | Cardiac arrest           | C      | +    | low         |
| 34 | ND11132        | Cardio  | Pneumonia                | C      | +    | low         |
| 35 | ND11182        | Cardio  | Disease process          | C      | +    | low         |
| 36 | ND11313        | Cardio  | Cardiovascular arrest    | C      | -    | 0           |
| 37 | ND11370        | Cardio  | Cardiac arrest           | B      | -    | 0           |
| 38 | ND11386        | Cardio  | Cardiac                  | C      | -    | 0           |
| 39 | ND11753        | Cardio  | COPD                     | C      | -    | 0           |
| 40 | ND11759        | Cardio  | Cardiovascular arrest    | C      | -    | 0           |
| 41 | ND11882        | Cardio  | Ruptured aneurysm        | C      | -    | 0           |
| 42 | <b>ND11986</b> | Cardio  | Cardiovascular arrest    | C      | +    | low         |
| 43 | ND11989        | Cardio  | Respiratory arrest       | C      | -    | 0           |
| 44 | ND12029        | Cardio  | Cardiac arrest           | C      | -    | 0           |

|    |                |        |                             |   |   |       |
|----|----------------|--------|-----------------------------|---|---|-------|
| 45 | ND12091        | Cardio | Multisystem organ failure   | C | - | 0     |
| 46 | ND12102        | Cardio | Pneumonia                   | C | - | 0     |
| 47 | <b>ND12192</b> | Cardio | Respiratory failure         | C | + | large |
| 48 | ND12326        | Cardio | Cardiopulmonary arrest      | C | - | 0     |
| 49 | ND12327        | Cardio | Cardiac arrest              | C | - | 0     |
| 50 | ND12346        | Cardio | Congestive heart failure    | C | - | 0     |
| 51 | ND12351        | Cardio | Stroke                      | C | - | 0     |
| 52 | ND12372        | Cardio | Encephalopathy              | C | - | 0     |
| 53 | <b>ND12389</b> | Cardio | Cardiac arrest              | C | + | low   |
| 54 | ND12403        | Cardio | Respiratory failure         | C | - | 0     |
| 55 | ND12609        | Cardio | Respiratory failure         | C | - | 0     |
| 56 | ND12661        |        |                             |   | + | low   |
| 57 | ND12679        | Cardio | Unspecified                 | C | + | low   |
| 58 | ND12709        | Cardio | Pneumonia                   | C | + | low   |
| 59 | ND12492        | Cardio | Unspecified                 | C | + | low   |
| 60 | ND12690        | Cardio | Intraventricular hemorrhage | C | - | 0     |
| 61 | <b>ND13067</b> | Cardio | Cardiovascular arrest       | C | + | large |
| 62 | ND13134        | Cardio | Head trauma                 | C | - | 0     |
| 63 | ND13238        | Cardio | Heart failure               | C | + | low   |
| 64 | ND13388        | Cardio | Heart failure               | C | - | 0     |
| 65 | ND13510        | Cardio | Respiratory failure         | C | - | 0     |
| 66 | ND13567        | Cardio | Intracerebral hemorrhage    | C | - | 0     |
| 67 | ND13646        | Cardio | Cardiac arrest              | C | - | 0     |
| 68 | ND13734        | Cardio | Cardiac arrest              | C | - | 0     |
| 69 | ND13745        | Cardio | Myocardial infarction       | C | - | 0     |
| 70 | ND13754        | Cardio | Atherosclerosis             | C | - | 0     |
| 71 | ND13769        | Cardio | Respiratory arrest          | C | - | 0     |
| 72 | ND13887        | Cardio | Cardiac/Respiratory failure | C | - | 0     |
| 73 | ND13918        | Cardio | Cardiac arrest              | C | - | 0     |
| 74 | ND13980        | Cardio | Respiratory failure         | C | - | 0     |
| 75 | ND14027        | Cardio | Congestive heart failure    | C | - | 0     |
| 76 | ND14034        | Cardio | Cardiac arrest              | C | - | 0     |
| 77 | <b>ND14100</b> | Cardio | Stroke                      | B | + | large |
| 78 | ND14131        | Cardio | Congestive heart failure    | C | - | 0     |
| 79 | ND14183        | Cardio | Cardiogenic shock           | C | - | 0     |
| 80 | ND14276        | Cardio | Cardiac arrest              | C | - | 0     |
